# Sex-biased admixture and assortative mating shape genetic variation and influence demographic inference in admixed Cabo Verdeans

Katharine L Korunes,<sup>1</sup> Giordano Bruno Soares-Souza,<sup>2</sup> Katherine Bobrek,<sup>3</sup> Hua Tang,<sup>4</sup> Isabel Inês Araújo,<sup>5</sup> Amy Goldberg,<sup>\*1,6</sup> Sandra Belezã<sup>\*\*2,6</sup>

1) Evolutionary Anthropology, Duke University, Durham, North Carolina, 27705, USA

2) Department of Genetics and Genome Biology, University of Leicester, Leicester, LE1 7RH, United Kingdom

3) Department of Anthropology, Emory University, Atlanta, Georgia, 30322, USA

4) Department of Genetics, Stanford University School of Medicine, Stanford, California, 94305 USA

5) Faculdade de Ciências e Tecnologia, Universidade de Cabo Verde (Uni-CV), Praia, Ilha de Santiago, Cabo Verde

6) These authors contributed equally to this work

\*Correspondence: amy.goldberg@duke.edu

\*\*Correspondence: sdsb1@leicester.ac.uk

# 1 Abstract

2 Genetic data can provide insights into population history, but first we must understand the  
3 patterns that complex histories leave in genomes. Here, we consider the admixed human  
4 population of Cabo Verde to understand the patterns of genetic variation left by social and  
5 demographic processes. First settled in the late 1400s, Cabo Verdeans are admixed descendants  
6 of Portuguese colonizers and enslaved West African people. We consider Cabo Verde's well-  
7 studied historical record alongside genome-wide SNP data from 563 individuals from 4 regions  
8 within the archipelago. We use genetic ancestry to test for patterns of nonrandom mating and  
9 sex-specific gene flow, and we examine the consequences of these processes for common  
10 demographic inference methods and for genetic patterns. Notably, multiple population genetic  
11 tools that assume random mating underestimate the timing of admixture, but incorporating  
12 non-random mating produces estimates more consistent with historical records. We consider  
13 how admixture interrupts common summaries of genomic variation such as runs-of-  
14 homozygosity (ROH). While summaries of ROH may be difficult to interpret in admixed  
15 populations, differentiating ROH by length class shows that ROH reflect historical differences  
16 between the islands in their contributions from the source populations and post-admixture  
17 population dynamics. Finally, we find higher African ancestry on the X chromosome than on  
18 the autosomes, consistent with an excess of European males and African females contributing to  
19 the gene pool. Considering these genomic insights into population history in the context of  
20 Cabo Verde's historical record, we can identify how assumptions in genetic models impact  
21 inference of population history more broadly.

## 22 Author Summary

23 Patterns of genetic variation are often used to infer human population histories; however  
24 population-genetic models make a variety of simplifying assumptions that often neglect the  
25 demographic and social dynamics of human populations. Here, we use the population of Cabo  
26 Verde as a case study to understand the patterns of genetic variation left by social and  
27 demographic processes. The islands of Cabo Verde were first settled in the late 1400s by  
28 Portuguese colonizers and enslaved West African people. We consider genomic data from four  
29 regions within the archipelago alongside historical records that document settlement patterns,  
30 timing, and sociocultural dynamics within the islands. We use genetic ancestry to test for  
31 nonrandom mating and sex-specific demography. We show that these sociocultural processes  
32 may bias inference of population history parameters and distributions of shared ancestry in the  
33 region. Overall, by providing insights into the patterns of genetic variation social processes  
34 leave in human genomes for a population with a well-studied historical record, we highlight  
35 processes to consider in order to more accurately understand the history of populations without  
36 extensive records.

## 37 Introduction

38 Patterns of genetic variation are often used to infer human population histories, such as  
39 fluctuations in population size, the timing of gene flow, and changes in population structure (1–  
40 7). These studies have been informative about ancient and modern populations that may lack

41 historical records (8–12). However, by necessity, population-genetic models make a variety of  
42 simplifying assumptions that often neglect the demographic and social dynamics of human  
43 populations. For example, many classical models assume random mating, but within empirical  
44 populations mating is often nonrandom, known as assortative mating. Positive assortative  
45 mating in human populations can keep haplotype blocks together, affecting evolutionary  
46 processes and our ability to infer population history (13–15). Further, male and female  
47 demographic processes can differ and vary over time. Comparisons between the X  
48 chromosome and autosomes have shown that population sizes and migration rates differ  
49 between males and females of many human populations (16–20).

50

51 The challenges of inferring human demographic history are particularly apparent on short  
52 timescales of tens of generations, where changes in allele frequencies may be difficult to observe  
53 and biased by dynamics not captured by classic models. Admixed populations provide an  
54 opportunity to examine evolutionary processes on short timescales using admixture linkage-  
55 disequilibrium (LD) structure rather than potentially small changes in allele frequencies.

56 Understanding the patterns generating the distribution of ancestry within an admixed  
57 population is also important as genomic data has shown how widespread admixture is  
58 throughout human evolution (8,11,21–26).

59

60 In admixed populations, nonrandom mating can be driven by factors that correlate with genetic  
61 ancestry. For example, spouse pairs within multiple Latino populations are correlated in their  
62 genomic ancestry (13,15). When mating patterns lead to a positive correlation in genomic

63 ancestry, this specific type of nonrandom mating, referred to as ancestry-assortative mating, can  
64 increase the likelihood that individuals in mating pairs share recent common ancestors. Recent  
65 work has begun to assess the implications of these patterns, including effects on common  
66 demographic inference strategies and on genetic/phenotypic variation (7,14,24). One genetic  
67 consequence of positive ancestry-assortative mating is an increase in long runs of homozygosity  
68 (ROH), which arise when long tracts of homozygous genotypes occur due to inheritance of  
69 identical by descent (IBD) haplotypes from recent common ancestors. Across modern human  
70 populations, ROH are common and typically range in length from kilobases to megabases (27–  
71 30). In the field of population genetics, we are just beginning to learn about ROH dynamics and  
72 expectations in admixed populations, which do not necessarily fit expectations built from  
73 homogenous populations (30,31). For example, we know that distinct length classes of ROH  
74 reflect demographic factors from different timescales, but as we explore here, it is unclear what  
75 these distributions of ROH mean in populations that have undergone major demographic  
76 transitions such as recent admixture. Patterns of genetic variation can also be shaped by  
77 differences in male and female demographic processes. In many human populations,  
78 population sizes and migration rates differ between males and females, leading to differences in  
79 ancestry patterns on the X chromosome vs the autosomes (16–20).

80

81 Here, we use the admixed population of Cabo Verde as a case study to understand the patterns  
82 of genetic variation left by multifaceted social and demographic processes in humans. Admixed  
83 populations of African ancestry, such as the population of Cabo Verde, are often excluded in the  
84 context of medical genetics and human evolutionary genetics, despite their importance and

85 widespread global presence (32–34). The record of Cabo Verde population history is vast,  
86 including royal charters, letters from Crown officials, captains and other sea explorers’ journals,  
87 records of the economic activities in Cabo Verde (e.g., landowners’ rents and number of  
88 enslaved individuals traded), detailed ship logs of trade activity, and church censuses from the  
89 18<sup>th</sup> century on, which allows us to generate realistic assumptions about colonization and  
90 demography (35–41). We consider patterns of genetic variation alongside historical records that  
91 document many aspects of Cabo Verdean history, including settlement patterns, timing, and  
92 sociocultural dynamics. Specifically, we use distributions of genetic ancestry to test for ancestry-  
93 assortative mating and sex-specific gene flow. We examine the consequences of these processes  
94 for genetic variation, such as patterns of homozygosity, and for common demographic inference  
95 methods. In turn, by elucidating the patterns of genetic variation social processes leave in  
96 human genomes for a population with a well-studied historical and ethnographic record, we  
97 can better use population-genomic methods to explore the history of populations without  
98 extensive records.

## 99 **Cabo Verdean history**

100 The recently admixed human population of Cabo Verde presents a particularly relevant  
101 opportunity to examine how sex-biased admixture and nonrandom mating shape genetic  
102 patterns and influence demographic inference. Cabo Verde is an archipelago off the coast of  
103 Senegal, inhabited today by admixed descendants of Portuguese colonizers and enslaved West  
104 African people who settled the unpopulated islands beginning in the mid-1400s (42–45). Since  
105 the archipelago was unoccupied prior to the 1460s, we have historical knowledge of the start of

106 admixture and the contributing source populations, with written records clearly documenting  
107 arrival times by island. Additionally, the island geography imposes population structure within  
108 Cabo Verde, and historical records document differences in population sizes, mating patterns,  
109 and social customs by island population (see Methods for historical data sources).

110

111 The settlement of the islands was influenced by island geography and ecology, and is often  
112 divided into three different temporal stages, which are associated with changes in the economy  
113 (35). The initial settlement stage (beginning in the 1460s) corresponds to the peopling of the  
114 Southern island Santiago, followed by the nearby island of Fogo 20 years later (Fig 1). During  
115 this time, the economy was centered around large cotton plantations and expanding trade with  
116 the Senegambian coast. This trade included the exportation of great numbers of enslaved  
117 Africans to Cabo Verde, the majority of which became part of the commercial trade to the  
118 Americas (36,37). In the 17<sup>th</sup> century, following the decline of the slavery-based economy of  
119 Santiago and Fogo, many free farmers seeking better farming conditions migrated to the  
120 northwestern islands of Santo Antão and São Nicolau. These migrations comprised the second  
121 settlement stage. In contrast to Santiago and Fogo, these northwestern islands did not become  
122 populous economic centers (35). During the third and final settlement stage, São Vicente in the  
123 northwestern group of islands was colonized by settlers from the neighboring islands in the  
124 mid 19<sup>th</sup> century. With the opening of Mindelo's harbor at that time, São Vicente prospered  
125 from the advent of commercial Atlantic shipping, becoming the second most important island  
126 of the archipelago after Santiago in terms of population size. In the 19<sup>th</sup> century, the eastern

127 islands Sal, Boa Vista, and Maio were also open to English and North American ships, but these  
128 islands never became densely populated (35,37).

129

130 Previous investigations of genetic ancestry in Cabo Verde (42,43,45) have shown extensive  
131 admixture in the archipelago and differences in the mean African genetic ancestry across  
132 islands, which may reflect the differences in the settlement history and suggest restricted gene  
133 flow between islands. These past studies of Cabo Verdean genetic admixture have explored  
134 how genetic ancestry connects to phenotypic variation such as skin and eye color (42,43), and to  
135 cultural information such as linguistic variation (45). Some earlier analyses of post-admixture  
136 population structure were based on Y-chromosome diversity (35), giving insight into male-  
137 specific demographic processes. Here, we examine how historical and social processes influence  
138 genetic variation and population-genetic inference of demography. We consider how the  
139 distributions of segments of DNA shared identically by descent within and among individuals  
140 (as measured by IBD, kinship, and ROH) relate to patterns of genetic ancestry in an admixed  
141 population. We integrate several population genomic approaches using autosomal and X-  
142 chromosome ancestry and genetic variation patterns to infer the sex-specific demographic  
143 history of the last ~20 generations since founding, and we consider the potential biases of  
144 ancestry-assortative mating on the inference of admixture timing. Overall, we provide insights  
145 into the population history of Cabo Verde and demonstrate how admixed populations can  
146 provide powerful test cases for understanding evolutionary processes on short timescales.



## 147 Results

### 148 **Patterns of shared ancestry reflect the colonization history of the islands**

149 Using genome-wide SNP data from 563 individuals, we examined four island regions of Cabo  
150 Verde (Fig 1; Supp Fig 1), which differ in their settlement histories. The partitioning of the  
151 considered island regions was also supported by genetic patterns. Namely, these regions  
152 showed quantitatively distinct distributions of IBD tracts, as we explore below, and were  
153 supported by clustering patterns in PCA (Supp Fig 1), in which the three northwestern islands  
154 grouped together (and with the eastern island Boa Vista) despite the different settlement time of  
155 São Vicente Island.

156  
157 Global ancestry proportions reflect extensive European and West African admixture and concur  
158 with previous results (43) (Supp Fig 2), with the median West African autosomal ancestry in  
159 Cabo Verdeans varying by island from 50% in Fogo, 56% in the northwestern islands in  
160 aggregate (the Northwest Cluster), 63% in Boa Vista, and 75% in Santiago. These inter-island  
161 differences alongside historical knowledge provide a comparative dataset for understanding  
162 how ancestry patterns can be used to infer demographic processes. Further, the known bound  
163 on admixture timing and the relative simplicity of the admixture history on the islands allows  
164 genetic ancestry to be decomposed into two source populations, which makes Cabo Verde a  
165 case study closer to population genetic models of admixture than most worldwide human  
166 populations.

167

168 The process of admixture can influence measures such as IBD and ROH that are often used to  
169 inform inference of population history, and theoretical expectations for these measures are less  
170 clear for admixed populations compared to homogeneous populations. Thus, we use multiple  
171 methods to examine relatedness in Cabo Verde, and we use this case study to underscore the  
172 need for further empirical and theoretical work to understand the dynamics of IBD and ROH in  
173 admixed populations. Patterns of IBD within and between populations provide opportunities to  
174 examine common ancestry based on the number and sizes of segments of IBD. Using these  
175 summaries of IBD to examine relatedness between and within regions of Cabo Verde, we found  
176 that patterns of shared ancestry reflect the successive settlement history of the islands. Notably,  
177 Santiago has the lowest mean number and total length of IBD segments between individuals  
178 (Supp Fig 4-5). In contrast, we observe the highest levels of IBD within and between the  
179 Northwest Cluster and Boa Vista.

180

181 To summarize patterns of IBD within and between the four island regions, we built a network  
182 of relationships with pairs of individuals connected if they have IBD levels in the top 3% of the  
183 Cabo Verde IBD distribution (Fig 1; see Supp Fig 3 for lower levels of IBD and within-island  
184 networks). In a non-admixed population, these edges roughly correspond to 4<sup>th</sup>-degree relatives  
185 or closer (e.g., great-great-grandparents, great-great-grandchildren, great-aunts/uncles, or  
186 grand-nieces/nephews). At this level of relatedness, we find that the presence of pairs of  
187 individuals within and between islands connected by an edge is common, suggestive of recent  
188 relatives both within and across islands. However, relatedness parameters estimated under

189 simple models of structure likely do not hold in many human populations, such as recently  
190 admixed populations. Kinship estimated under a framework (46) specifically designed for  
191 arbitrary population structures (Supp Fig 6A) is consistent with both the overall trends in IBD  
192 tracts (Supp Fig 4-5), and supports the presence of a subset of very closely related individuals  
193 within the data.

194

195 The lower levels of IBD (Fig 1, Supp Fig 3-5) and lower kinship estimates (Supp Fig 6) observed  
196 in Santiago are consistent with expectations based on the island's history, as Santiago was the  
197 first Cabo Verdean island to be founded and has the largest population size. Santiago is also  
198 likely to have relatively high genetic diversity as a result of having the highest proportion of  
199 West African ancestry, based on the expectation that kinship in human populations generally  
200 reflects serial bottlenecks due to dispersal from Africa (47,48). In contrast, the high levels of IBD  
201 within and between the Northwest Cluster and Boa Vista reflect well-documented serial  
202 founding and migrations during the settlement of the islands. In general, kinship estimates also  
203 reflect the colonization history of the islands, with Cabo Verdeans of greater European ancestry  
204 sharing greater kinship compared to individuals with greater West African ancestry (Supp Fig  
205 6). Exceptions to this trend were most noticeable in individuals from Fogo and the Northwest  
206 Cluster, where it was most apparent that some observed relatedness patterns do not result in  
207 smooth ordering of global ancestry proportions (Supp Fig 6B). This observation led us to  
208 hypothesize that other sociocultural processes beyond proportions of ancestry, such as  
209 nonrandom mating, may drive patterns of relatedness in Cabo Verde.

## 210 **Nonrandom mating shapes patterns of ancestry and influences**

### 211 **demographic inference**

212 To test for ancestry assortative mating within Cabo Verde, we examined whether the genomic  
213 ancestries of individuals in mating pairs correlate with each other. To this end, we applied  
214 ANCESTOR to computationally infer the parental ancestry proportions that likely preceded the  
215 ancestry haplotypes we observe today. We repeated this analysis for each chromosome  
216 independently to prevent uncertainty introduced by matching interchromosomal haplotypes.  
217 As an example, the inferred ancestries of the parental haplotypes that likely preceded  
218 chromosome 7 are significantly positively correlated for all islands except for Boa Vista (Fig 2A).  
219 We observed similar results across the full set of autosomes (Fig 2B). We found that the inferred  
220 ancestries of mating pairs in the previous generation are positively correlated, and that these  
221 correlations differ significantly from expectations under random mating (random sampling  
222 empirical distributions of parental haplotypes into pairs, shown in Supp Fig 7).

223

224 We next considered how the observed genetic evidence of assortative mating can be leveraged  
225 in the context of inferring population history. To estimate the timing of the onset of admixture,  
226 we applied the method of Zaitlen et al. (2017) (7), which describes the decay of local ancestry  
227 disequilibrium (LAD) as a function of assortative mating strength, migration rate,  
228 recombination rate, and the number of generations since admixture began. Using this LAD-  
229 based method, we inferred admixture timing under random mating and under our empirical  
230 estimates of ancestry-assortative mating strength (Fig 3). The LAD-based method produced

231 older estimates of admixture timing under a model including both assortative mating and  
232 constant migration (Fig 3, Supp Fig 8), with increasingly older timing estimates as assortative  
233 mating strength increases (Supp Fig 8). Under the same set of migration rates (0 or 1% per  
234 generation, to demonstrate estimates under a broad range of migration rates), when we varied  
235 the strength of ancestry-assortative mating from a situation of random mating to a situation of  
236 strong ancestry-assortative mating, the models that considered substantial ancestry-assortative  
237 mating (parental correlation in ancestry  $> 0.3$ ), yielded admixture timing estimates closest to the  
238 historical estimates (Fig 3, Supp Fig 8).

239

240 We additionally applied two strategies, ALDER (4) and MultiWaver 2.0 (5), that are not  
241 intended to account for assortative mating. ALDER uses the extent of LD decay among  
242 neighboring loci to infer mixture proportions and dates. In contrast, MultiWaver uses the length  
243 distribution of ancestral tracks. Assuming a generation time of 25 years, decay rates estimated  
244 with ALDER suggest admixture timing in the mid to late 1700s (Fig 3; all timing estimates are  
245 shown in Supp Table 1). MultiWaver chose a multi-wave admixture model for Santiago (Fig 3A)  
246 and the Northwest Cluster (Fig 3C), but selected an isolation model for Fogo (Fig 3B) and Boa  
247 Vista (Fig 3D).

248

249 The estimates of admixture timing that do not explicitly consider ancestry-assortative mating,  
250 from ALDER and MultiWaver, are noticeably more recent than the known founding of Cabo  
251 Verde in late 1400s. Results from the LAD-based method described in Zaitlen et al. (2017) (7)  
252 align more closely with historical records, particularly when we allowed for both ancestry-

253 assortative mating and constant migration (Fig 3, Supp Fig 8). While multiple complex  
254 demographic factors likely impact these estimates of admixture timing (see “Patterns of genetic  
255 variation and admixture in Cabo Verde influence demographic inference” in the Discussion),  
256 the evidence of ancestry-assortative mating in Cabo Verde (Fig 2, Supp Fig 7) and the LAD-  
257 based inferences incorporating assortative mating (Fig 3, Supp Fig 8) suggest that explicitly  
258 accounting for ancestry-assortative mating improves estimates of admixture timing, while the  
259 assumption of random mating leads to underestimation of the age of admixture.

## 260 **Runs-of-homozygosity (ROH) reflect the contributions of the source** 261 **populations and patterns of nonrandom mating.**

262 We identified ROH using the method of Pemberton et al. (2012) as implemented in the software  
263 GARLIC (30,49). This method classifies ROH into three categories (short, medium, and long)  
264 based on the modeling of the length distribution in each population as a mixture of Gaussian  
265 distributions. ROH arise when IBD haplotypes are inherited from a common ancestor. Thus,  
266 distinct length classes reflect inheritance from ancestors at different timescales in the  
267 population’s history. We examined the distributions of total ROH per genome (sum of ROH  
268 segments of a specific length) within Cabo Verde, partitioning the distributions into length  
269 classes that are enriched for pre- and post-colonization processes. Under the ROH classification  
270 model of GARLIC, short and medium ROH formed due to processes that largely occurred  
271 within the source populations prior to the founding of Cabo Verde. Thus, while ROH in non-  
272 admixed populations are often modeled as three length classes, we emphasize the differences in

273 pre- and post-admixture dynamics in Cabo Verde by focusing on shorter ROH (comprising both  
274 short and medium as called with GARLIC) vs. long ROH (Fig 4A-B). To ensure our  
275 comparisons of shorter vs long ROH used reasonable classification boundaries, we repeated this  
276 analysis under four alternative length classification schemes (see Methods; Supp Fig 9). The  
277 results were consistent across the four classification schemes (Supp Fig 9).

278

279 Since methods for detecting and interpreting ROH have been developed primarily in non-  
280 admixed populations (30,50), we consider ROH in Cabo Verde as an example of ROH  
281 distributions in admixed populations where we can explore results in the context of ancestry  
282 and population history. For example, to test for genetic evidence that population bottlenecks  
283 contributed to observed patterns, we estimated ancestry-specific population sizes (Supp Fig 10).  
284 Ancestry-specific population sizes in Cabo Verde suggest bottlenecks of both source  
285 populations, followed by population expansion within the past 10 generations (1,2). If the  
286 length of ROH in an individual's genome is driven by distance from Africa, as expected based  
287 on previous work (29,30), we predict the total length of ROH per genome to negatively correlate  
288 with West African admixture proportion. Consistent with this expectation, we observe a  
289 negative correlation between the total ROH and West African ancestry proportions in Santiago,  
290 Fogo, and the Northwest Cluster (Supp Fig 11A; correlations and significance values for total  
291 ROH and by length class are provided in Supp Fig 11). Breaking total ROH into shorter and  
292 long ROH, we see that this negative correlation is driven primarily by shorter ROH (Fig 4; Supp  
293 Fig 11B-C, Supp Fig 9).

294

295 Comparing the Cabo Verdean islands to each other, we observed the lowest levels of total ROH  
296 in all length classes of ROH in Santiago (pairwise Mann-Whitney U tests  $p < 1 \times 10^{-8}$ ). The low  
297 amounts of all length classes of ROH in Santiago are consistent with several historical attributes  
298 of the islands, including serial founding beginning with the settlement of Santiago. Serial  
299 founding resulting in bottlenecks is expected to increase shorter ROH by reducing the number  
300 of ancestral lineages. But because shorter ROH reflects background relatedness from the source  
301 populations, shorter ROH are expected to be more sensitive to the contributions of the source  
302 populations.

303

304 Despite recent colonization bottlenecks, we observed that some admixed individuals in Cabo  
305 Verde present lower levels of ROH per genome than either of the source population proxies.  
306 Specifically, our classification of ROH into shorter and long ROH (Fig 4; Supp Fig 9) revealed  
307 that Santiago has significantly lower levels of shorter ROH compared the West African  
308 reference population (Mann-Whitney U  $p = 5.87 \times 10^{-7}$ ), while long ROH are not depleted  
309 (Mann-Whitney U  $p = 0.841$ ). This observation that Santiago has significantly lower levels of  
310 shorter ROH compared to even the West African reference is perhaps surprising given the  
311 canonical view of African source populations as generically having the lowest ROH in  
312 worldwide samples. This is consistent with the idea that shorter ROH are contributed to the  
313 population from older shared ancestors in the source populations, and that these tracts can be  
314 further interrupted with local ancestry from another source population upon admixture. In  
315 contrast, long ROH are likely driven by post-admixture dynamics such as small population size  
316 and mating preferences, and long ROH tracts may span multiple local ancestries. Indeed, we



317 observed that ROH often span multiple ancestries, with long ROH spanning more switches in  
318 local ancestry per megabase. Specifically, 1.21% of shorter ROH contained at least one ancestry  
319 switch and 18.99% of long ROH contained at least one ancestry switch. Dividing ancestry  
320 switches by tract length, shorter ROH contain an average of 0.072 ancestry switches/Mb  
321 (standard deviation = 0.89), while long ROH contain an average of 0.089 switches/Mb (standard  
322 deviation = 0.24) (pairwise Mann-Whitney U test  $p < 1 \times 10^{-8}$ ).

323

324 While ROH patterns in Cabo Verde are consistent with several historical observations, we  
325 emphasize that caution is warranted in applying methods and expectations built using non-  
326 admixed populations. We also note that, though we used a model-based ROH detection  
327 approach that included steps to mitigate genotyping errors and biases in allele frequency  
328 estimates, sensitivity and specificity of ROH detection is generally lower for shorter ROH.  
329 Further, records suggest that enslaved African individuals in Cabo Verde came from the  
330 Senegambian region of Africa, and lack of genomic data from this vast region makes it difficult  
331 to assess how the diversity in contributing African ethnic groups might contribute to low  
332 shorter ROH levels in Cabo Verde. These sources of uncertainty necessitate caution in inferring  
333 population history from ROH distributions. However, the observed differences in ROH among  
334 the islands suggest that ROH are sensitive to population genetic processes even on the short  
335 timescale since Cabo Verde's settlement. Together, these observations and caveats underscore  
336 the need for future work testing the effects of admixture on ROH and on ROH detection, as we  
337 explore in the Discussion.

338 **Ancestry patterns on the X chromosome vs the autosomes reflect sex-**  
339 **biased demographic processes**

340 On all islands, autosomal versus X chromosome ancestry patterns suggest that male and female  
341 contributions differ significantly by source population (Fig 5A). Specifically, there is higher  
342 West African ancestry on the X chromosome than the autosomes (mean African ancestry  
343 proportion for the X chromosome = 0.76; mean African ancestry proportion for autosomes =  
344 0.60; Wilcoxon Signed-Rank Test  $p < 1 \times 10^{-8}$  for Santiago, Fogo, and the Northwest Cluster;  $p =$   
345 0.0013 for Boa Vista), consistent with sex-biased contributions of the founders. To quantitatively  
346 explore these differences in male vs female demographic history, we used a model-based  
347 approach to estimate differences between male and female contributions (3). A model of  
348 constant admixture is supported over a model of instantaneous admixture by historical records  
349 (see Methods for historical data sources) and by our comparison of admixture timing estimates  
350 (above). Using the method of Goldberg and Rosenberg for a model of constant admixture, we  
351 compared observed and expected X-chromosomal and autosomal ancestry over a grid of  
352 possible parameter values. Following the implementation from Goldberg et al. (2017) (51), Fig  
353 5B presents results from the 0.1% of parameter sets closest to observed data based on a  
354 Euclidean distance between observed population mean ancestries on the X and autosomes and  
355 expected ancestries under the model (Supp Fig 12 shows the same data represented by plotting  
356 the male contributions). These estimated sex-specific contributions from West African and  
357 European source populations under a model of constant admixture suggest greater  
358 contributions from West African females and European males.

359

360 Given our observation that source populations make distinct contributions to ROH in Cabo  
361 Verde, we next investigate differences in autosomal vs X chromosome ROH content. Differences  
362 in autosomal vs X chromosome ROH may arise in part due to the source populations  
363 contributing in a sex-biased manner. Notably, this effect would be seen most in shorter ROH,  
364 since shorter ROH reflect the homozygosity of older haplotypes and background relatedness  
365 from the source populations. However, it is challenging to disentangle processes shaping X vs  
366 autosomal ROH, due to the smaller effective population size of the X chromosome. Our results  
367 suggest that sex-biased admixture processes in Cabo Verde are reflected in ROH, with lower  
368 levels of shorter ROH on the X chromosome than on autosomes (Fig 6A). European individuals  
369 have higher levels of ROH than West African individuals, and the higher contributions of  
370 African X chromosomes (vs European X chromosomes) may drive the lower levels of short  
371 ROH in Cabo Verde on the X chromosome vs the autosomes (Fig 6A). Long ROH reflects  
372 different dynamics, potentially including the reduced post-admixture population size and other  
373 sex-specific processes.

## 374 Discussion

375 In this study, we leveraged patterns of genetic variation in Cabo Verde to infer the demographic  
376 history of the past ~20 generations. We found that distinct genetic patterns of four island  
377 regions within the archipelago reflect the colonization history of the islands, including island-  
378 specific settlement timing, admixture dynamics, mating patterns, and sex-biased demography.

379 Together these results demonstrate how patterns of ancestry and genetic variation are shaped  
380 by social and demographic forces on short timescales. By better understanding how complex  
381 population histories generate genetic variation, we can improve interpretation of inference from  
382 populations without historical records.

383 **Patterns of genetic variation and admixture in Cabo Verde reflect**  
384 **colonization history and subsequent sociocultural dynamics**

385 The observed island-specific genetic patterns reflect the complex ecological and social factors  
386 that shaped the settlement of Cabo Verde. Historical evidence suggests that the islands were  
387 founded in a stepping-stone pattern, with settlement stages that were accompanied by  
388 important economic and sociocultural shifts (35). Early written records of the population  
389 (described below) suggest that admixture began early during the settlement of Cabo Verde,  
390 despite the highly racially stratified, slavery-based system that characterized the first settlement  
391 stage (38). The second and third stages were carried out by mostly already-admixed individuals  
392 who had become a significant group within Cabo Verdean society and who migrated from the  
393 southern to the northern islands (39). We found that the staggered settlement history and the  
394 island-specific population dynamics shaped patterns of ancestry and genetic variation within  
395 Cabo Verde.

396

397 Admixture in Cabo Verde is consistent with a model of continuous gene flow from Europe and  
398 West Africa, with European males and African females contributing predominantly to the Cabo

399 Verdean gene pool, as seen in other admixed populations that result from the trans-Atlantic  
400 slave trade (52,53). PCA (Supp Fig 1), IBD (Fig 1, Supp Fig 3-5), and kinship (Supp Fig 6) are  
401 consistent with genetic drift occurring during the archipelago's settlement history of  
402 consecutive founder effects and subsequent relative isolation of the islands. Specifically,  
403 individuals are genetically more related within an island than among islands, and considerably  
404 more individuals from the northern islands and Fogo are connected to each other by high IBD  
405 pairwise connections (Supp Fig 4-5). We observed differences in IBD that reflect the  
406 contributions of the source populations, such as Santiago having both the highest West African  
407 ancestry proportions and the lowest overall levels of IBD sharing. The higher African genomic  
408 ancestry on Santiago is consistent with previous results (42,43), and indicates differences in  
409 settlement patterns despite the fact that colonization of the other islands involved migrations  
410 from Santiago and was based on the same slavery-based system.

411  
412 Using a mechanistic model of sex-biased admixture (3), we used differences in ancestry on the X  
413 chromosome vs the autosomes to examine sex-biased migration in Cabo Verde. We found that  
414 admixture occurred primarily through the mating of European males and African females,  
415 consistent with historical work that documents sex bias during the settlement of Cabo Verde.  
416 First records of the demographic distribution in Cabo Verde are found in a letter by a judicial  
417 official Pero de Guimarães to the Portuguese King in 1513, which stated the presence of 118  
418 European individuals in Santiago, of which only four were (single) women (54). The marginal  
419 presence of European females throughout the founding of Cabo Verde contributed to the  
420 extensive genetic admixture currently found in the archipelago. The distribution of ROH in

421 autosomes versus X chromosome is influenced by initial male versus female contributions to the  
422 admixed population's gene pool. Throughout the islands, the higher contributions of African X  
423 chromosomes (vs European X chromosomes) may drive the lower levels of short ROH in Cabo  
424 Verde on the X chromosome vs the autosomes (Fig 6A). These results underscore the long-  
425 lasting genetic impacts of the trans-Atlantic slave trade, as has been recently shown in admixed  
426 populations across the Americas (53).

427

428 Despite only a few hundred years of unique population histories among the islands, we also  
429 found that patterns of genetic variation reflect island-specific patterns in post-admixture  
430 dynamics. Observed patterns of IBD, kinship, and long ROH are all consistent with overall high  
431 levels of relatedness within Cabo Verde, particularly in Fogo and the northwestern islands. In  
432 other worldwide populations, similarly high IBD levels have been attributed to founder effects  
433 (55,56), though we note that pairwise IBD measures cannot be directly compared due to the  
434 admixture process. In Cabo Verde, patterns of relatedness may be shaped by both founder  
435 effects and by post-admixture dynamics such as nonrandom mating keeping similar haplotypes  
436 together rather than distributing them randomly throughout mating pairs in the population.  
437 Indeed, we inferred a positive correlation between mating pairs of the previous generation,  
438 suggesting ancestry-assortative mating on the short timescale since the founding of the islands.  
439 Mating patterns and sex-biased admixture are distinct—but interacting—processes in the  
440 history of Cabo Verde. Sex-biased migration determined the gene pool within Cabo Verde,  
441 while patterns of nonrandom mating within the islands shaped subsequent generations of  
442 admixture. These mating patterns were tied to social and economic structure. European

443 enslavers sexually coerced enslaved African women during slavery. After the end of slavery,  
444 racially unbalanced control of landownership and higher social status of Europeans resulted in  
445 continued socioeconomic pressures for African women to have children with European men.  
446 Such unions often resulted in improved socioeconomic status for both the women and their  
447 children. For example, the first admixed individual to assume an important position within the  
448 administration of Santiago was recorded in 1546 (57). Over generations, Cabo Verde became a  
449 population of extensively admixed ancestry, with mating patterns shaped by the interconnected  
450 effects of social position and skin color. This type of nonrandom mating may have been more  
451 prominent in the second half of the 17<sup>th</sup> century, due to the large exodus of the white population  
452 following the decay of the slave trade. With this population shift, historical sources say that the  
453 socioeconomic elite of the islands became predominately the “white children of the islands”  
454 (38), leading to further racial segregation. This historical evidence of nonrandom mating  
455 patterns—together with our genetic observations—demonstrates how quickly changes in social  
456 structure can impact population homozygosity and differentiation.

457

458 The island of Fogo stands out as having unique social and historical processes, even though it  
459 was settled shortly after Santiago. Fogo’s society was, since its origins, a conservative rural  
460 society whose main economic activity was to produce goods to trade in the African coast. The  
461 socioeconomic elite was patriarchal and aristocratic (40), and composed primarily of related  
462 families, which promoted first-cousin marriages (41). The sustenance of this class depended on  
463 land ownership, which allowed the slavery-based system to be perpetuated longer in Fogo than  
464 in Santiago (35,40). The unique attributes of Fogo are reflected in population genetic patterns.

465 For example, we found that African ancestry proportion align with kinship patterns overall, but  
466 exceptions were most obvious in individuals from Fogo and the Northwest Cluster, where some  
467 observed relatedness patterns are not as clearly explained by global ancestry proportions. In our  
468 estimation of admixture timing using local ancestry disequilibrium, we observed that Fogo has  
469 greater levels of local ancestry disequilibrium than the other islands. Higher local ancestry  
470 disequilibrium may be driven by ancestry-assortative mating. Additionally, it may be that Fogo  
471 has experienced stronger founder effects, which would decrease the number of ancestral  
472 lineages. Indeed, the higher levels of shorter ROH within Fogo (Fig 4; Supp Fig 9) are consistent  
473 with founder effects increasing background relatedness and thus increasing shorter ROH.  
474 Though we emphasize the need for further work to understand the dynamics of ROH in  
475 admixed populations, these patterns are in agreement with the lower Y-chromosome haplotype  
476 diversity observed in Fogo compared to the other islands (42). Long ROH and IBD patterns  
477 gives us further insights about the post-admixture demographic processes in the archipelago,  
478 including uncovering genetic consequences of consecutive founder effects.

## 479 **Patterns of genetic variation and admixture in Cabo Verde influence** 480 **demographic inference**

481 The admixture dynamics, founder effects, and mating patterns within Cabo Verde shape  
482 summaries of genetic variation that are often used to inform demographic inference, such as  
483 local ancestry disequilibrium, IBD, and ROH. To investigate the effects of these population  
484 dynamics on demographic inference, we estimated admixture timing using multiple population



485 genetic tools. Estimates of admixture timing from genetic data were most concordant with  
486 historical records when using inference based on local ancestry disequilibrium (7), allowing for  
487 ancestry-assortative mating and migration after the founding of the admixed population. Under  
488 this method, we tested a range of ancestry-assortative mating strengths (0 vs values inferred  
489 using ANCESTOR in Fig 3 and a broader range of values in Supp Fig 8) and migration rates (0  
490 vs 1% each generation). The migration levels are used to demonstrate the trends of timing  
491 estimates using constant migration and assortative mating, rather than to obtain a specific  
492 estimate of the migration parameters. Consistent with previous theoretical work on the impact  
493 of assortative mating on the timing of admixture, we find that estimates that do not account for  
494 ancestry assortment are more recent than historical records and than estimates that include  
495 ancestry assortment (7,58). Under random mating, haplotypes are distributed randomly in  
496 mating pairs in a population, allowing recombination to shuffle haplotypes over generations. In  
497 contrast, ancestry-assortative mating can keep ancestral haplotypes more intact, leading to  
498 underestimation of the number of generations of admixture when estimating admixture timing.  
499 Zaitlen et al. (2017) and Goldberg et al. (2020) theoretically demonstrate that certain models of  
500 non-random mating in admixed populations maintain variation in the ancestry proportion and  
501 linkage over time—summary statistics that will make admixture appear more recent than it is  
502 when mating patterns are not considered (7,58). Our evidence of ancestry-assortative mating in  
503 Cabo Verde underscores the importance of accounting for nonrandom mating in understanding  
504 admixture and inferring demographic history. Assortative mating has been documented with  
505 respect to genetic ancestry, socioeconomic factors, and phenotypic characteristics (7,13–15,59),

506 but remains an under-recognized force in human population genetics and demographic  
507 inference.  
508  
509 Notably, assortative mating alone was not enough to obtain time of admixture estimates  
510 concordant with historical records. Admixture timing estimates were most concordant with the  
511 historical records when allowing both assortative mating and constant admixture. An  
512 admixture scenario that allows multi-wave or constant admixture model is compatible with  
513 historical work suggesting constant migration from both Europe and West African throughout  
514 the settlement of the islands. Importantly, the authors of ALDER and MultiWaver point out that  
515 methods for inferring admixture timing have varying sensitivities to different admixture  
516 scenarios (4,5). MultiWaver may not be able to accurately infer demographic histories that  
517 deviate from its pre-defined admixture models. ALDER notes that multi-wave or continuous  
518 admixture can lead to more recent estimates of admixture timing, as the method inherently  
519 assumes single-point admixture. Despite this caveat, ALDER is frequently applied in cases  
520 where admixture is not strictly instantaneous.

521  
522 All of the timing methods we used placed admixture timing for the different islands closer  
523 together than historical dates of settlement, consistent with historical expectations that the  
524 initial admixture in the southern islands was significant, and that many individuals that  
525 occupied the northern and eastern islands during the second and third settlement stages of  
526 Cabo Verde were already admixed. For example, the serial founding of the islands may explain  
527 why estimates of admixture timing for Boa Vista were closer to historical records. While Boa

528 Vista was founded most recently, it was founded by already admixed individuals. This  
529 observation, together with IBD and kinship patterns, support the serial founding of the groups  
530 of islands as the main model of settlement of Cabo Verde, as opposed to their independent  
531 settling as some historical data suggest (35). This type of serial founding scenario is common  
532 throughout recent human migration, underscoring that settlement patterns, in addition to  
533 settlement timing, are critical components of accurately inferring human demographic history.

534

535 We found that Cabo Verde's island-specific demographic history and admixture dynamics have  
536 important genomic consequences, as observed with ROH. Despite the relatively recent  
537 colonization of the islands, some individuals presented even lower overall levels of ROH than  
538 African reference populations. We found that low overall levels of ROH in Cabo Verde are  
539 driven by shorter length ROH. This observation is consistent with the idea that shorter ROH  
540 can be attributed to older shared ancestors from the source populations, and these tracts can be  
541 interrupted with admixed ancestry upon admixture. However, many admixed individuals still  
542 present excess long ROH, likely reflecting post-admixture processes such as serial founding and  
543 ancestry-assortative mating. The observed island-specific distributions of ROH are consistent  
544 with the colonization history of the islands. For example, the cultural dynamics and higher rates  
545 of first-cousin marriages in Fogo (41), possibly driving high levels of long ROH (Fig 4B). In  
546 contrast, Santiago has both the oldest population and the largest population size, and has  
547 comparatively low levels of both shorter and long ROH. These observations suggest that more  
548 work, both empirical and theoretical, is needed to understand the interacting forces of local  
549 ancestry and ROH.

550

551 In sum, we provide insights into the population history of Cabo Verde and demonstrate how  
552 admixed populations can provide powerful test cases for understanding demographic processes  
553 and genomic consequences in recent human history. We show that patterns of shared ancestry  
554 between and within the islands (quantified with IBD and kinship estimates) reflect serial  
555 founder effects as well as settlement patterns such as post-admixture nonrandom mating. We  
556 find that accounting for nonrandom mating allows us to improve inference of admixture timing  
557 and better contextualize genomic consequences of admixture dynamics, such as ROH. We find  
558 that differences in ancestry on the X chromosome vs the autosomes reflect sex-biased  
559 demographic processes. Given the ubiquity of admixture throughout modern human  
560 population, these results provide important, generalizable considerations for the study of recent  
561 human evolution.

## 562 Methods

### 563 **Study population and ancestry reference panels**

564 We used genotype data from Beleza et al. (2013) (43), which included 563 Cabo Verdeans from  
565 the following regions of the archipelago: Santiago (n = 172), Fogo (n = 129), Boa Vista (n = 26),  
566 and the three northwestern islands in aggregate (Northwest Cluster; n = 236) (Figure 1; Supp  
567 Fig 1). The genotype data exclude cryptic related individuals (first-degree relatives) identified  
568 by kinship analyses at the time of sampling. In accordance with historical records and previous

569 work showing that Iberian and Senegambian populations are suitable proxies for the ancestry  
570 sources of Cabo Verde (45), we leveraged data from the 1000 Genomes Project to estimate  
571 admixture proportions and call local ancestry in the Cabo Verde individuals, as described  
572 below. We merged the Cabo Verde genotypes with genotypes from 107 GWD (Gambian in  
573 Western Division - Mandinka) and 107 IBS (Iberian Population in Spain) samples called from  
574 high-coverage resequencing data released through the International Genome Sample Resource  
575 (60,61). Our final merged dataset consisted of 884,656 autosomal and 20,967 X chromosome  
576 SNPs shared between the Cabo Verde samples and the reference samples, with average  
577 missingness rates of 0.0017 by SNP for autosomes, and 0.0024 for the X chromosome.

## 578 **Historical records**

579 Throughout our analyses, we draw comparisons between genetic results and historical records.  
580 We used primary historical documents, mainly historical letters to the Portuguese Crown,  
581 documenting demographic characteristics of the islands across time. Our analyses of the  
582 historical data took into consideration the generalized interpretations of historian scholars such  
583 as Correia e Silva (2001; 2002) (35,39), Cabral (2001; 2012) (38,40) and Baleno (2001) (36). These  
584 sources document the dates of the stages of settlement mentioned above, along with associated  
585 with changes in the economy. We refer to the interpretation of genealogical data by Cabral  
586 (2012) (40) and Barbosa (1997) (41) for evidence of the structure of the Fogo's society and for  
587 evidence of first-cousin marriages within Fogo (41).

## 588 **Characterization of ancestry**

589 To produce estimates of admixture proportions, we first performed unsupervised clustering of  
590 the samples using ADMIXTURE v1.3.0 (62) (see Supp Table 3 for a summary of all  
591 computational methods used in this study). ADMIXTURE was run separately for the autosomal  
592 and X chromosome datasets after pruning based on linkage disequilibrium (LD) using the  
593 indep-pairwise option of PLINK v1.9 with a 50-SNP sliding window incremented by 10 SNPs,  
594 and an LD threshold of  $r^2 = 0.5$  (63). This pruned dataset included 514,551 autosomal and 12,706  
595 X chromosome SNPs. We estimated individual ancestries by averaging over ten independent  
596 unsupervised ADMIXTURE runs using  $K = 2$ , given the historical and genetic support for two  
597 source populations (43,45). Using the LD-pruned dataset, we also visualized the data using  
598 PLINK's principal component analysis (--pca) function, confirming that the samples cluster  
599 approximately based on their geographic memberships, and that West African vs European  
600 ancestry clearly separates on the first principal component (Supp Fig 1). We phased all samples  
601 using SHAPEIT2 (64). After running SHAPEIT -check to exclude sites not contained within the  
602 reference map, we ran SHAPEIT to yield phased genotypes at 881,279 autosomal SNPs and  
603 20,793 X chromosome SNPs. We then called local ancestry with RFMix v1.5.4 (65) PopPhased  
604 under a two-way admixture model using the West African and European reference genotypes  
605 described above. These local ancestry calls are publicly available via Zenodo (66). Ancestry  
606 proportions estimated with ADMIXTURE and RFMix here are highly correlated with results  
607 from Beleza et al. (2013) (43), using the same genotype data but with different software (*frappe*  
608 (67) and SABER (68)) and an older reference dataset (Supp Fig 2). To test whether phasing and

609 local ancestry calls were robust against the choice of reference panels, we repeated the  
610 SHAPEIT and RFMix steps using a reference dataset composed by all African (ACB, ASW, ESN,  
611 GWD, LWK, MSL, and YRI) and European (CEU, FIN, GBR, IBS, and TSI) populations available  
612 from the high-coverage resequencing data released by the 1000 Genomes Project (60,61). The  
613 resulting local ancestry calls with all AFR and EUR reference panels correlated closely with calls  
614 using GWD and IBS as reference panels (Supp Fig 2C). We also performed local ancestry calling  
615 using ELAI, a method that performs both phasing and local ancestry assignment (69). Again  
616 using the IBS and GWD reference genotypes described above, we ran ELAI under a two-way  
617 admixture model using the following parameters: -mg (number of generations) 20, -s (EM steps)  
618 30, -C (upper clusters) 2, and -c (lower clusters) 10. The resulting local ancestry calls from ELAI  
619 correlated closely with calls from RFMix (Supp Fig 2D).

## 620 **Inference of admixture timing**

621 We applied three distinct strategies for estimating the timing of the onset of admixture in Cabo  
622 Verde: ALDER (4), MultiWaver 2.0 (5), and a method based on patterns of linkage  
623 disequilibrium between local ancestry tracts (7). We first converted the genotypes to  
624 EIGENSTRAT format using *convert* (70,71). We then used ALDER to date admixture timing on  
625 each island using default parameters with mindis = 0.005 and source populations GWD and  
626 IBS. We ran MultiWaver using the ancestry tracts inferred by RFMix, default parameters, and  
627 100 bootstraps. Finally, we followed the pipeline of Zaitlen et al. (2017) (7) and its  
628 accompanying scripts to use the RFMix local ancestry calls to measure local ancestry  
629 disequilibrium (LAD) decay in 10 Mb windows, overlapping by 1 Mb. Specifically, we started

630 with the first SNP on each autosome, used the 10 Mb window end point to identify the SNP  
631 closest to the inside of this boundary, and then used local ancestry calls at these positions to  
632 determine LAD. We repeated this process along each chromosome to obtain LAD in 279  
633 autosomal windows. Using possible values of admixture generations ranging from 5-25, we  
634 determined the best fit using island-specific mean LAD decay over the 279 autosomal windows,  
635 assortative mating parameters estimated with ANCESTOR (see below), a starting autosomal  
636 admixture proportion of 0.65, and either no migration or with migration (migration rate = 0.01).

### 637 **Tests for ancestry-assortative mating**

638 We tested for ancestry-assortative mating over the last generation using ANCESTOR (15,72).  
639 ANCESTOR uses phased local ancestry tracts in the current generation to estimate the ancestral  
640 proportions of the two parents of each individual. We used the inferred parental ancestries to  
641 test for assortative mating seen as a positive correlation in ancestry between inferred mating  
642 pairs, and we used the strength of the observed positive correlation (Pearson's R for each  
643 population, using the median value from all chromosomes) as the assortative mating parameter  
644 in our application of the LAD-based method for inferring admixture timing. We also examined  
645 evidence of nonrandom mating by estimating genetic relatedness within Cabo Verde using both  
646 IBD (see below) and kinship coefficients (46).

### 647 **Identification of IBD tracts and ROH**

648 Following the analysis pipeline of S. R. Browning et al. (2018) (2), we inferred segments of IBD  
649 using the haplotype-based IBD detection method Refined IBD (73), and we estimated ancestry-



650 specific population size using IBDNe (1). After running Refined IBD, we used its gap-filling  
651 utility to remove gaps between segments less than 0.6 cM that had at most one discordant  
652 homozygote. We then filtered out IBD segments smaller than 5 cM, as short segments below  
653 this threshold are difficult to accurately detect (74). To visualize IBD sharing in Fig 1 and Supp  
654 Fig 3, the sum of IBD shared in each pairwise comparison of individuals was plotted by using  
655 Cytoscape 3.8 to group nodes by island, position nodes within each island according to a  
656 prefuse force-directed algorithm, and scale the color of edges based on log-transformed total  
657 IBD length (75).

658  
659 We called ROH using GARLIC v.1.1.6 (49), which implements the ROH calling pipeline of  
660 Pemberton et al. (2012) (30). We performed this analysis separately for the autosomes and X  
661 chromosome. Based on the pipeline described in Szpiech et al. (2017), we used a single constant  
662 genotyping error rate of 0.001, we allowed GARLIC to automatically choose a window size for  
663 each population (--auto-winsize), and we used the resample flag to mitigate biases in allele  
664 frequency estimates caused by differing sample sizes. This resulted in GARLIC selecting a  
665 window size of 50 SNPs in each of the Cabo Verde regions and in GWD, and a window size of  
666 40 for IBS. Using a three-component Gaussian mixture model, GARLIC classified ROH into  
667 three length groups: small/class A, medium/class B, and long/class C ROH. Across all  
668 populations, class A/B and class B/C size boundaries were inferred as approximately 300 kb and  
669 1 Mb, respectively (see Supp Table 2 for population-specific parameters, including LOD cutoffs  
670 and size boundaries). Using only the females, we then classified ROH for the X chromosome.

671

672 To evaluate the influence of ROH size classification cutoffs in the results, we repeated size  
673 classification using the `--size-bounds` flag in GARLIC to impose four additional sets of size class  
674 boundaries. We first collected the population-specific length classification cut-offs from the 64  
675 worldwide populations provided by Pemberton et al. (2012), which represents an extensive  
676 range of classification schemes. We repeated ROH-calling with GARLIC using the minimum,  
677 mean, and maximum of the 64 population-specific boundaries reported in Pemberton et al.  
678 (2012) (Supp Fig 9A-C). Finally, we classified ROH based on the commonly used rule of thumb  
679 that a time depth of  $m$  meioses is expected to give a mean IBD segment length of  $100/m$  cM (76).  
680 In this case, common ancestors within the past 20 generations (post-admixture) would give an  
681 expected IBD segment length of approximately 2.5 Mb or longer, so we applied 2.5 Mb as the  
682 shorter/long ROH boundary in Supp Fig 9D.

### 683 **Estimation of sex bias**

684 To examine sex bias, we applied a mechanistic model of sex-biased admixture (3) to infer  
685 admixture parameters under a model of constant migration. We performed this analysis for all  
686 563 Cabo Verdean individuals pooled together, and then repeated the analysis for each island  
687 independently. We provided the model with the following parameters: grid increment size  
688 (0.02), the observed autosomal and X admixture proportions (based on ADMIXTURE estimates  
689 described above), the proportion of females in the sample, and the percentile cutoff for  
690 parameters to keep (0.1%).

## 691 **Acknowledgements**

692 We thank Jorge Rocha for his contribution during project conception and sampling, and Greg  
693 Barsh for his support in later stages of data collection. We thank Noah Zaitlen for sharing  
694 scripts to assist in our application of the Zaitlen et al. (2017) local ancestry disequilibrium  
695 method. This work was supported by MRC-UK MR/M01987X/1 and FCT-Portugal PTDC/BIA-  
696 BDE/64044/2006 awarded to Sandra Beleza; NIH NIGMS grant R35 GM133481 awarded to  
697 Amy Goldberg; NIH NIGMS grant F32 GM139313 awarded to Katharine Korunes; and by  
698 CNPq (CSF/PDE 207651/2014-0) awarded to Giordano Bruno Soares-Souza. We acknowledge  
699 the source of the reference datasets: 1000G 30x data generated at the New York Genome Center  
700 with funds provided by NHGRI Grant 3UM1HG008901-03S1. We thank Dr. Kirk Lohmueller  
701 and three anonymous reviewers for their helpful feedback on this work. Finally, we would like  
702 to thank the Cabo Verdean participants for their invaluable contributions, and the University of  
703 Cabo Verde administration for their support.

## 704 **Declaration of interests**

705 The authors declare no competing interests.

## 706 **Data and Code Availability**

707 Sampling consent forms do not allow for public release of genotype data. Inferred local ancestry  
708 information can be found at <https://doi.org/10.5281/zenodo.4021277>. Code generated for this  
709 study can be found at [https://github.com/agoldberglab/CaboVerde\\_Demographic\\_Analyses](https://github.com/agoldberglab/CaboVerde_Demographic_Analyses).

## 710 **References**

- 711 1. Browning SR, Browning BL. Accurate Non-parametric Estimation of Recent Effective  
712 Population Size from Segments of Identity by Descent. *Am J Hum Genet.* 2015 Sep  
713 3;97(3):404–18.
- 714 2. Browning SR, Browning BL, Daviglus ML, Durazo-Arvizu RA, Schneiderman N, Kaplan  
715 RC, et al. Ancestry-specific recent effective population size in the Americas. *PLOS Genet.*  
716 2018 May 24;14(5):e1007385.
- 717 3. Goldberg A, Rosenberg NA. Beyond 2/3 and 1/3: The Complex Signatures of Sex-Biased  
718 Admixture on the X Chromosome. *Genetics.* 2015 Sep;201(1):263–79.
- 719 4. Loh P-R, Lipson M, Patterson N, Moorjani P, Pickrell JK, Reich D, et al. Inferring  
720 admixture histories of human populations using linkage disequilibrium. *Genetics.* 2013  
721 Apr;193(4):1233–54.
- 722 5. Ni X, Yuan K, Liu C, Feng Q, Tian L, Ma Z, et al. MultiWaver 2.0 : modeling discrete and  
723 continuous gene flow to reconstruct complex population admixtures. *Eur J Hum Genet.*  
724 2019 Jan;27(1):133–9.
- 725 6. Schiffels S, Durbin R. Inferring human population size and separation history from  
726 multiple genome sequences. *Nat Genet.* 2014 Aug;46(8):919–25.
- 727 7. Zaitlen N, Huntsman S, Hu D, Spear M, Eng C, Oh SS, et al. The Effects of Migration and  
728 Assortative Mating on Admixture Linkage Disequilibrium. *Genetics.* 2017 Jan;205(1):375–  
729 83.
- 730 8. Busby GBJ, Hellenthal G, Montinaro F, Tofanelli S, Bulayeva K, Rudan I, et al. The Role of  
731 Recent Admixture in Forming the Contemporary West Eurasian Genomic Landscape. *Curr*  
732 *Biol.* 2015 Oct 5;25(19):2518–26.
- 733 9. Fernandes V, Brucato N, Ferreira JC, Pedro N, Cavadas B, Ricaut F-X, et al. Genome-Wide  
734 Characterization of Arabian Peninsula Populations: Shedding Light on the History of a  
735 Fundamental Bridge between Continents. Mulligan C, editor. *Mol Biol Evol.* 2019  
736 Mar;36(3):575–86.
- 737 10. Font-Porterias N, Arauna LR, Poveda A, Bianco E, Rebato E, Prata MJ, et al. European  
738 Roma groups show complex West Eurasian admixture footprints and a common South  
739 Asian genetic origin. *PLOS Genet.* 2019 Sep 23;15(9):e1008417.
- 740 11. Lazaridis I, Patterson N, Mittnik A, Renaud G, Mallick S, Kirsanow K, et al. Ancient  
741 human genomes suggest three ancestral populations for present-day Europeans. *Nature.*  
742 2014 Sep 18;513(7518):409–13.

- 743 12. Skoglund P, Malmström H, Raghavan M, Storå J, Hall P, Willerslev E, et al. Origins and  
744 genetic legacy of Neolithic farmers and hunter-gatherers in Europe. *Science*. 2012 Apr  
745 27;336(6080):466–9.
- 746 13. Risch N, Choudhry S, Via M, Basu A, Sebro R, Eng C, et al. Ancestry-related assortative  
747 mating in Latino populations. *Genome Biol*. 2009 Nov 20;10(11):R132.
- 748 14. Sebro R, Peloso GM, Dupuis J, Risch NJ. Structured mating: Patterns and implications.  
749 *PLOS Genet*. 2017 Apr 6;13(4):e1006655.
- 750 15. Zou JY, Park DS, Burchard EG, Torgerson DG, Pino-Yanes M, Song YS, et al. Genetic and  
751 socioeconomic study of mate choice in Latinos reveals novel assortment patterns. *Proc*  
752 *Natl Acad Sci U S A*. 2015 Nov;112(44):13621–6.
- 753 16. Arbiza L, Gottipati S, Siepel A, Keinan A. Contrasting X-Linked and Autosomal Diversity  
754 across 14 Human Populations. *Am J Hum Genet*. 2014 Jun 5;94(6):827–44.
- 755 17. Bustamante CD, Ramachandran S. Evaluating signatures of sex-specific processes in the  
756 human genome. *Nat Genet*. 2009 Jan;41(1):8–10.
- 757 18. Keinan A, Mullikin JC, Patterson N, Reich D. Accelerated genetic drift on chromosome X  
758 during the human dispersal out of Africa. *Nat Genet*. 2009 Jan;41(1):66–70.
- 759 19. Ramachandran S, Rosenberg NA, Feldman MW, Wakeley J. Population differentiation and  
760 migration: Coalescence times in a two-sex island model for autosomal and X-linked loci.  
761 *Theor Popul Biol*. 2008 Dec 1;74(4):291–301.
- 762 20. Wilkins JF, Marlowe FW. Sex-biased migration in humans: what should we expect from  
763 genetic data? *BioEssays*. 2006;28(3):290–300.
- 764 21. Busby GB, Band G, Si Le Q, Jallow M, Bougama E, Mangano VD, et al. Admixture into and  
765 within sub-Saharan Africa. Pickrell JK, editor. *eLife*. 2016 Jun 21;5:e15266.
- 766 22. Hellenthal G, Busby GBJ, Band G, Wilson JF, Capelli C, Falush D, et al. A Genetic Atlas of  
767 Human Admixture History. *Science*. 2014 Feb 14;343(6172):747–51.
- 768 23. Laso-Jadart R, Harmant C, Quach H, Zidane N, Tyler-Smith C, Mehdi Q, et al. The Genetic  
769 Legacy of the Indian Ocean Slave Trade: Recent Admixture and Post-admixture Selection  
770 in the Makranis of Pakistan. *Am J Hum Genet*. 2017 Dec;101(6):977–84.
- 771 24. Ruiz-Linares A, Adhikari K, Acuña-Alonzo V, Quinto-Sanchez M, Jaramillo C, Arias W, et  
772 al. Admixture in Latin America: Geographic Structure, Phenotypic Diversity and Self-  
773 Perception of Ancestry Based on 7,342 Individuals. *PLOS Genet*. 2014 Sep  
774 25;10(9):e1004572.

- 775 25. Triska P, Soares P, Patin E, Fernandes V, Cerny V, Pereira L. Extensive Admixture and  
776 Selective Pressure Across the Sahel Belt. *Genome Biol Evol.* 2015 Dec 1;7(12):3484–95.
- 777 26. Korunes KL, Goldberg A. Human genetic admixture. *PLOS Genet.* 2021 Mar  
778 11;17(3):e1009374.
- 779 27. Blant A, Kwong M, Szpiech ZA, Pemberton TJ. Weighted likelihood inference of genomic  
780 autozygosity patterns in dense genotype data. *BMC Genomics.* 2017 Dec 1;18(1):928.
- 781 28. Kirin M, McQuillan R, Franklin CS, Campbell H, McKeigue PM, Wilson JF. Genomic Runs  
782 of Homozygosity Record Population History and Consanguinity. *PLOS ONE.* 2010 Nov  
783 15;5(11):e13996.
- 784 29. McQuillan R, Leutenegger A-L, Abdel-Rahman R, Franklin CS, Pericic M, Barac-Lauc L, et  
785 al. Runs of Homozygosity in European Populations. *Am J Hum Genet.* 2008 Sep  
786 12;83(3):359–72.
- 787 30. Pemberton TJ, Absher D, Feldman MW, Myers RM, Rosenberg NA, Li JZ. Genomic  
788 Patterns of Homozygosity in Worldwide Human Populations. *Am J Hum Genet.* 2012  
789 Aug;91(2):275–92.
- 790 31. Mooney JA, Huber CD, Service S, Sul JH, Marsden CD, Zhang Z, et al. Understanding the  
791 Hidden Complexity of Latin American Population Isolates. *Am J Hum Genet.* 2018 Nov  
792 1;103(5):707–26.
- 793 32. Popejoy AB, Fullerton SM. Genomics is failing on diversity. *Nature.* 2016 13;538(7624):161–  
794 4.
- 795 33. Popejoy AB, Ritter DI, Crooks K, Currey E, Fullerton SM, Hindorff LA, et al. The clinical  
796 imperative for inclusivity: Race, ethnicity, and ancestry (REA) in genomics. *Hum Mutat.*  
797 2018;39(11):1713–20.
- 798 34. Landry LG, Ali N, Williams DR, Rehm HL, Bonham VL. Lack Of Diversity In Genomic  
799 Databases Is A Barrier To Translating Precision Medicine Research Into Practice. *Health  
800 Aff Proj Hope.* 2018;37(5):780–5.
- 801 35. Correia e Silva AL. Dinâmicas de decomposição e recomposição de espaços e sociedades.  
802 In: Santos, MEM, editor. *História geral de Cabo Verde.* Lisbon, Portugal; Praia, Cabo  
803 Verde: Instituto de Investigação Científica Tropical, Instituto Nacional de Investigação,  
804 Promoção e Património Culturais de Cabo Verde; 2002. p. 1–66.
- 805 36. Baleno IC. Povoamento e Formação da Sociedade. In: Albuquerque, L and Santos, MEM,  
806 editor. *História geral de Cabo Verde.* Lisbon, Portugal; Praia, Cabo Verde: Instituto de  
807 Investigação Científica Tropical, Instituto Nacional de Investigação, Promoção e  
808 Património Culturais de Cabo Verde; 2001. p. 125–77.

- 809 37. Russell-Wood A. *The Portuguese Empire, 1415-1808: A World on the Move*. Baltimore,  
810 Maryland: Johns Hopkins University Press; 1998. 289 p.
- 811 38. Cabral I. *Ribeira Grande: vida urbana, gente, mercancia, estagnação*. In: Santos, MEM,  
812 editor. *História geral de Cabo Verde*. Lisbon, Portugal; Praia, Cabo Verde: Instituto de  
813 *Investigação Científica Tropical, Instituto Nacional de Investigação, Promoção e*  
814 *Património Culturais de Cabo Verde*; 2001. p. 225–73.
- 815 39. Correia e Silva AL. *Espaço, ecologia e economia interna*. In: de Albuquerque L, Santos,  
816 MEM, editor. *História geral de Cabo Verde*. Lisbon, Portugal; Praia, Cabo Verde: Instituto  
817 *de Investigação Científica Tropical, Instituto Nacional de Investigação, Promoção e*  
818 *Património Culturais de Cabo Verde*; 2001.
- 819 40. Cabral I. *A evolução da sociedade fogueense: Através de um estudo prosopográfico da elite*  
820 *da ilha (sec. XVI-XVIII)*. 2012.
- 821 41. Barbosa, Gilda. *Casamento entre primos*. *J Terra Nova* No 246. 1997;
- 822 42. Beleza S, Campos J, Lopes J, Araújo II, Hoppfer Almada A, e Silva AC, et al. *The*  
823 *Admixture Structure and Genetic Variation of the Archipelago of Cape Verde and Its*  
824 *Implications for Admixture Mapping Studies*. Relethford JH, editor. *PLoS ONE*. 2012  
825 Nov;7(11):e51103.
- 826 43. Beleza S, Johnson NA, Candille SI, Absher DM, Coram MA, Lopes J, et al. *Genetic*  
827 *Architecture of Skin and Eye Color in an African-European Admixed Population*. Spritz  
828 RA, editor. *PLoS Genet*. 2013 Mar;9(3):e1003372.
- 829 44. Fernandes AT, Velosa R, Jesus J, Carracedo A, Brehm A. *Genetic differentiation of the*  
830 *Cabo Verde archipelago population analysed by STR polymorphisms*. *Ann Hum Genet*.  
831 2003 Jul;67(Pt 4):340–7.
- 832 45. Verdu P, Jewett EM, Pemberton TJ, Rosenberg NA, Baptista M. *Parallel Trajectories of*  
833 *Genetic and Linguistic Admixture in a Genetically Admixed Creole Population*. *Curr Biol*.  
834 2017;27(16):2529-2535.e3.
- 835 46. Ochoa A, Storey JD. *New kinship and FST estimates reveal higher levels of differentiation*  
836 *in the global human population*. *bioRxiv*. 2019 May;653279.
- 837 47. Reed FA, Tishkoff SA. *African human diversity, origins and migrations*. *Curr Opin Genet*  
838 *Dev*. 2006 Dec 1;16(6):597–605.
- 839 48. Tishkoff SA, Williams SM. *Genetic analysis of African populations: human evolution and*  
840 *complex disease*. *Nat Rev Genet*. 2002 Aug;3(8):611–21.

- 841 49. Szpiech ZA, Blant A, Pemberton TJ. GARLIC: Genomic Autozygosity Regions Likelihood-  
842 based Inference and Classification. Berger B, editor. *Bioinformatics*. 2017 Jul;33(13):2059-  
843 62.
- 844 50. Ceballos FC, Joshi PK, Clark DW, Ramsay M, Wilson JF. Runs of homozygosity: windows  
845 into population history and trait architecture. *Nat Rev Genet*. 2018 Apr;19(4):220-34.
- 846 51. Goldberg A, Günther T, Rosenberg NA, Jakobsson M. Ancient X chromosomes reveal  
847 contrasting sex bias in Neolithic and Bronze Age Eurasian migrations. *Proc Natl Acad Sci*.  
848 2017 Mar 7;114(10):2657-62.
- 849 52. Eltis D, Richardson D, Blight DW. Atlas of the Transatlantic Slave Trade [Internet]. Yale  
850 University Press; 2010 [cited 2020 Oct 9]. Available from:  
851 <https://www.jstor.org/stable/j.ctt5vm1s4>
- 852 53. Micheletti SJ, Bryc K, Esselmann SGA, Freyman WA, Moreno ME, Poznik GD, et al.  
853 Genetic Consequences of the Transatlantic Slave Trade in the Americas. *Am J Hum Genet*.  
854 2020 Aug 6;107(2):265-77.
- 855 54. Pero de Guimarães. Corregedor de Cabo Verde, carta de 22 de Maio de 1513. In: de  
856 Albuquerque L, Santos, MEM, editor. *História geral de Cabo Verde*. Lisbon, Portugal;  
857 Praia, Cabo Verde: Instituto de Investigação Científica Tropical, Instituto Nacional de  
858 Investigação, Promoção e Património Culturais de Cabo Verde; 1991. p. 219-23.
- 859 55. Moreno-Estrada A, Gravel S, Zakharia F, McCauley JL, Byrnes JK, Gignoux CR, et al.  
860 Reconstructing the Population Genetic History of the Caribbean. *PLOS Genet*. 2013 Nov  
861 14;9(11):e1003925.
- 862 56. Campbell CL, Palamara PF, Dubrovsky M, Botigué LR, Fellous M, Atzmon G, et al. North  
863 African Jewish and non-Jewish populations form distinctive, orthogonal clusters. *Proc Natl*  
864 *Acad Sci* [Internet]. 2012 Jul 31 [cited 2021 Aug 2]; Available from:  
865 <https://www.pnas.org/content/early/2012/07/31/1204840109>
- 866 57. Seibert G. Crioulização em Cabo Verde e São Tomé e Príncipe: divergências históricas e  
867 identitárias. *Afro-Ásia*. 2014 Jun 1;41-70.
- 868 58. Goldberg A, Rastogi A, Rosenberg NA. Assortative mating by population of origin in a  
869 mechanistic model of admixture. *Theor Popul Biol*. 2020 Aug 1;134:129-46.
- 870 59. Robinson MR, Kleinman A, Graff M, Vinkhuyzen AAE, Couper D, Miller MB, et al.  
871 Genetic evidence of assortative mating in humans. *Nat Hum Behav*. 2017 Jan 9;1(1):1-13.
- 872 60. Clarke L, Fairley S, Zheng-Bradley X, Streeter I, Perry E, Lowy E, et al. The international  
873 Genome sample resource (IGSR): A worldwide collection of genome variation  
874 incorporating the 1000 Genomes Project data. *Nucleic Acids Res*. 2017 Jan 4;45(D1):D854-9.



- 875 61. Fairley S, Lowy-Gallego E, Perry E, Flicek P. The International Genome Sample Resource  
876 (IGSR) collection of open human genomic variation resources. *Nucleic Acids Res.* 2020 Jan  
877 8;48(D1):D941–7.
- 878 62. Alexander DH, Novembre J, Lange K. Fast model-based estimation of ancestry in  
879 unrelated individuals. *Genome Res.* 2009 Sep;19(9):1655–64.
- 880 63. Purcell S, Neale B, Todd-Brown K, Thomas L, Ferreira MAR, Bender D, et al. PLINK: a tool  
881 set for whole-genome association and population-based linkage analyses. *Am J Hum*  
882 *Genet.* 2007 Sep;81(3):559–75.
- 883 64. Delaneau O, Zagury J-F, Marchini J. Improved whole-chromosome phasing for disease  
884 and population genetic studies. *Nat Methods.* 2013 Jan;10(1):5–6.
- 885 65. Maples BK, Gravel S, Kenny EE, Bustamante CD. RFMix: a discriminative modeling  
886 approach for rapid and robust local-ancestry inference. *Am J Hum Genet.* 2013  
887 Aug;93(2):278–88.
- 888 66. Hamid I, Korunes K, Beleza S, Goldberg A. Rapid adaptation to malaria facilitated by  
889 admixture in the human population of Cabo Verde [Internet]. Zenodo; 2020 [cited 2020 Sep  
890 21]. Available from: <https://zenodo.org/record/4021277#.X2kMuPxKhTY>
- 891 67. Tang H, Peng J, Wang P, Risch NJ. Estimation of individual admixture: analytical and  
892 study design considerations. *Genet Epidemiol.* 2005 May;28(4):289–301.
- 893 68. Tang H, Coram M, Wang P, Zhu X, Risch N. Reconstructing Genetic Ancestry Blocks in  
894 Admixed Individuals. *Am J Hum Genet.* 2006 Jul;79(1):1–12.
- 895 69. Guan Y. Detecting structure of haplotypes and local ancestry. *Genetics.* 2014  
896 Mar;196(3):625–42.
- 897 70. Patterson N, Price AL, Reich D. Population Structure and Eigenanalysis. *PLOS Genet.* 2006  
898 Dec 22;2(12):e190.
- 899 71. Price AL, Patterson NJ, Plenge RM, Weinblatt ME, Shadick NA, Reich D. Principal  
900 components analysis corrects for stratification in genome-wide association studies. *Nat*  
901 *Genet.* 2006 Aug;38(8):904–9.
- 902 72. Zou JY, Halperin E, Burchard E, Sankararaman S. Inferring parental genomic ancestries  
903 using pooled semi-Markov processes. *Bioinformatics.* 2015 Jun 15;31(12):i190–6.
- 904 73. Browning BL, Browning SR. Improving the accuracy and efficiency of identity-by-descent  
905 detection in population data. *Genetics.* 2013 Jun;194(2):459–71.

- 906 74. Nelson D, Kelleher J, Ragsdale AP, Moreau C, McVean G, Gravel S. Accounting for long-  
907 range correlations in genome-wide simulations of large cohorts. *PLOS Genet.* 2020 May  
908 5;16(5):e1008619.
- 909 75. Shannon P, Markiel A, Ozier O, Baliga NS, Wang JT, Ramage D, et al. Cytoscape: A  
910 Software Environment for Integrated Models of Biomolecular Interaction Networks.  
911 *Genome Res.* 2003 Nov;13(11):2498–504.
- 912 76. Thompson EA. Identity by Descent: Variation in Meiosis, Across Genomes, and in  
913 Populations. *Genetics.* 2013 Jun;194(2):301–26.
- 914

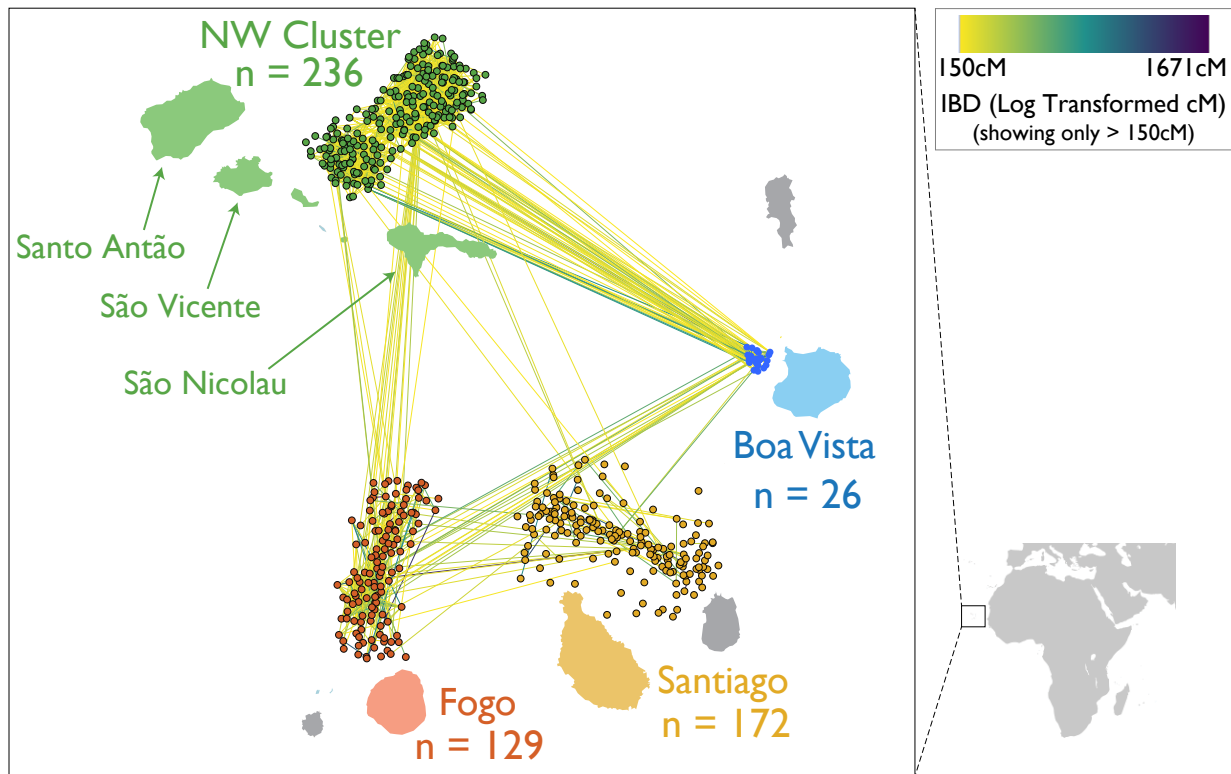

**Fig 1 | Shared ancestry between and within the islands in the context of geography.** Each island has a corresponding cluster of nodes representing all sampled individuals, with the individuals localized to be adjacent to the island where they were sampled. Node placement within islands is determined by a force-directed algorithm using pairwise shared IBD, meaning that the spread of each cluster reflects the level of relatedness in each population. Edges between the nodes represent total IBD tract length for pairs of individuals sharing more than 150 cM of total IBD, with edges colored using the log transformed total IBD length.

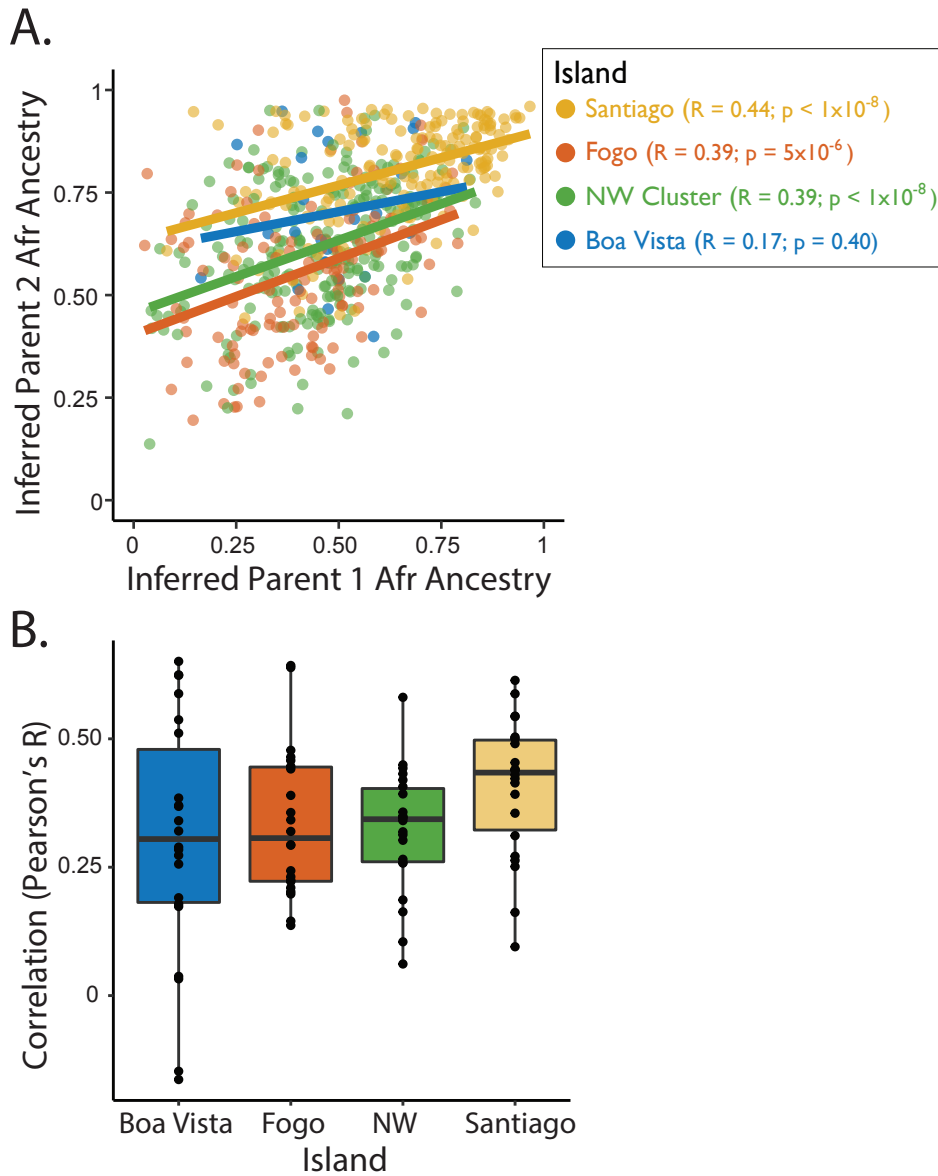

**Fig 2 | Correlation between inferred parental ancestries.** (A) For each Cabo Verdean individual, the inferred Parent 1 vs Parent 2 ancestry proportions are shown for an example chromosome (Chromosome 7), colored by island. (B) shows the set of correlation coefficients between inferred parental ancestries for each autosomal chromosome.

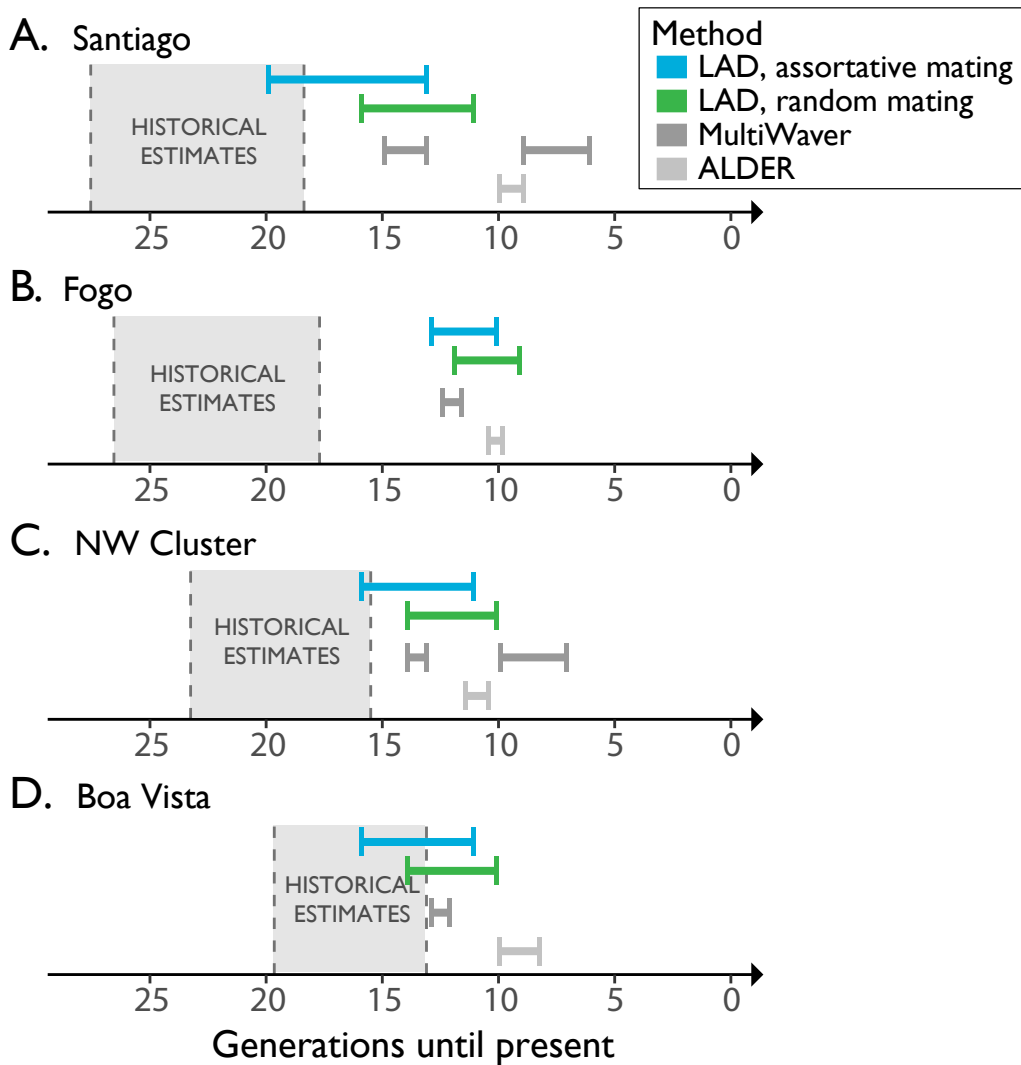

**Fig 3 | Timelines of inferred generations of admixture for each island of Cabo Verde.** The island regions are listed in order of known settlement timing beginning with Santiago (A), followed by Fogo (B), and then the later migrations to the Northwest Cluster (C) and Boa Vista (D). For each island, admixture timing inferred with population genetic methods are shown in comparison to historical records. Historical estimates of when each island was first settled are shown in generations, based on a range of generation times (20-30 year generation time). Within each LAD-based estimate of admixture timing, the presented interval reflects the range of estimates generated under the assumption of constant migration rate ( $m = 0.01$ ; yielding older estimates) to the assumption of no migration ( $m = 0$ ; yielding more recent estimates). MultiWaver results show the admixture generations inferred under the admixture model selected by MultiWaver, with 0.95 CI.

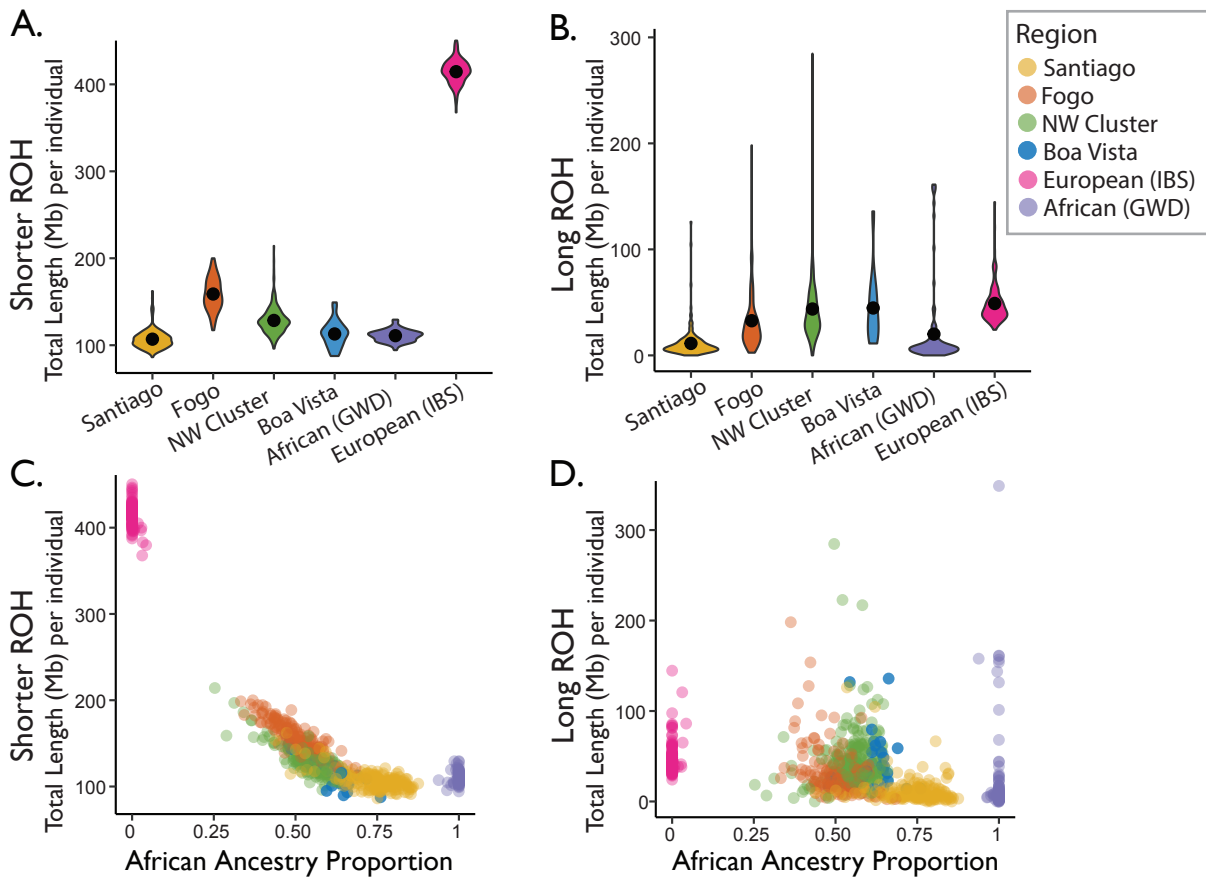

**Fig 4 | ROH content by island and in the context of ancestry.** (A-B) Violin plots show the population-specific distributions of the total (summed over each genome) length of autosomal ROH per individual. Solid black dots represent the within-population means. (C-D) Total length of autosomal ROH per individual plotted against West African ancestry proportions and colored by population.

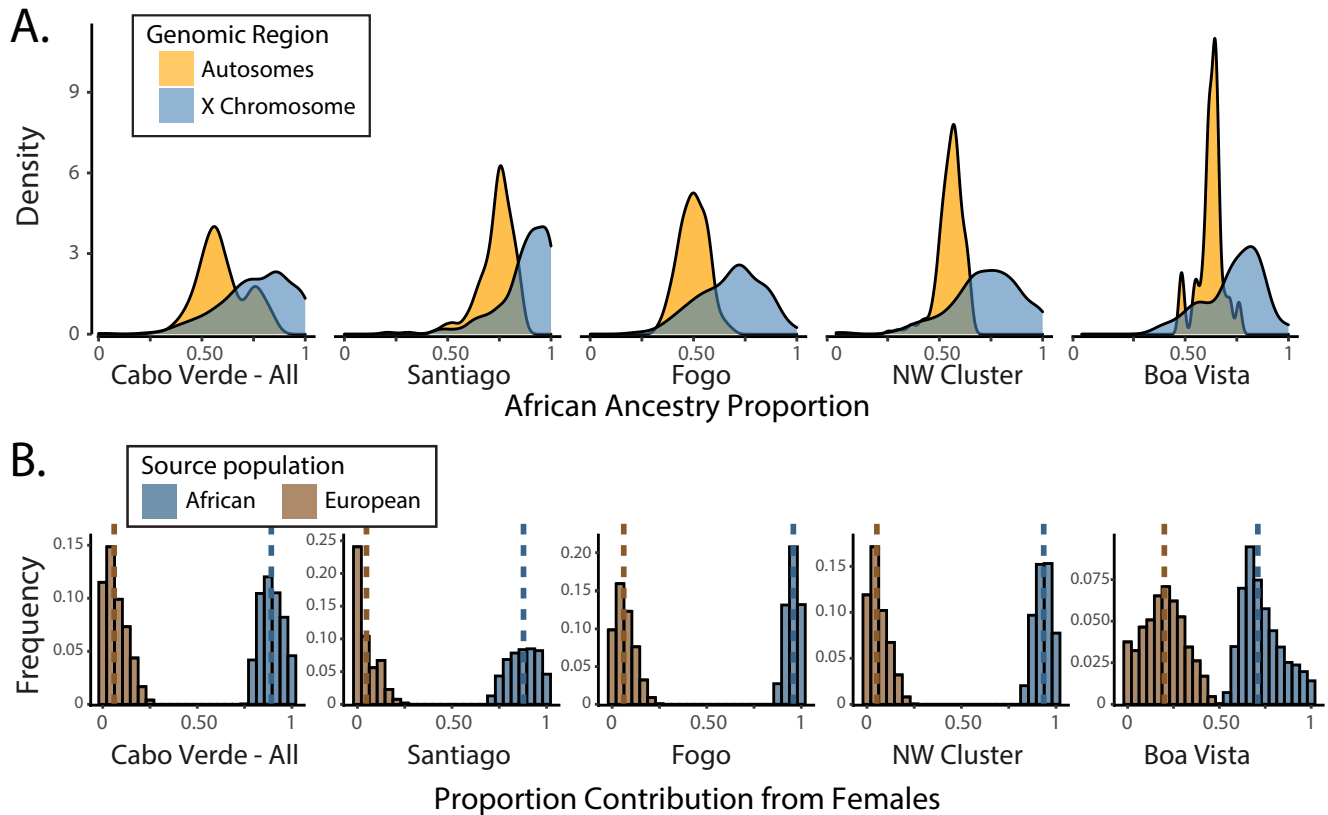

**Fig 5 | Sex-biased admixture in Cabo Verde.** (A) The distribution of West African ancestry proportion on the autosomes and X chromosome for each of the island regions, estimated with ADMIXTURE. (B) Under a model of constant admixture over time, the fraction of the total contribution of genetic material originating from females for West African and European source populations. Here, we show the distribution of parameter sets for the smallest 0.1% of Euclidean distances between the model-predicted and observed X and autosomal ancestry from a grid of possible parameter values. The range of sex-specific contributions from West African and European source populations that produce ancestry estimates closest to those observed in Cabo Verde are shown for Cabo Verde as a whole (left), and then broken down by region, with medians (dashed lines).

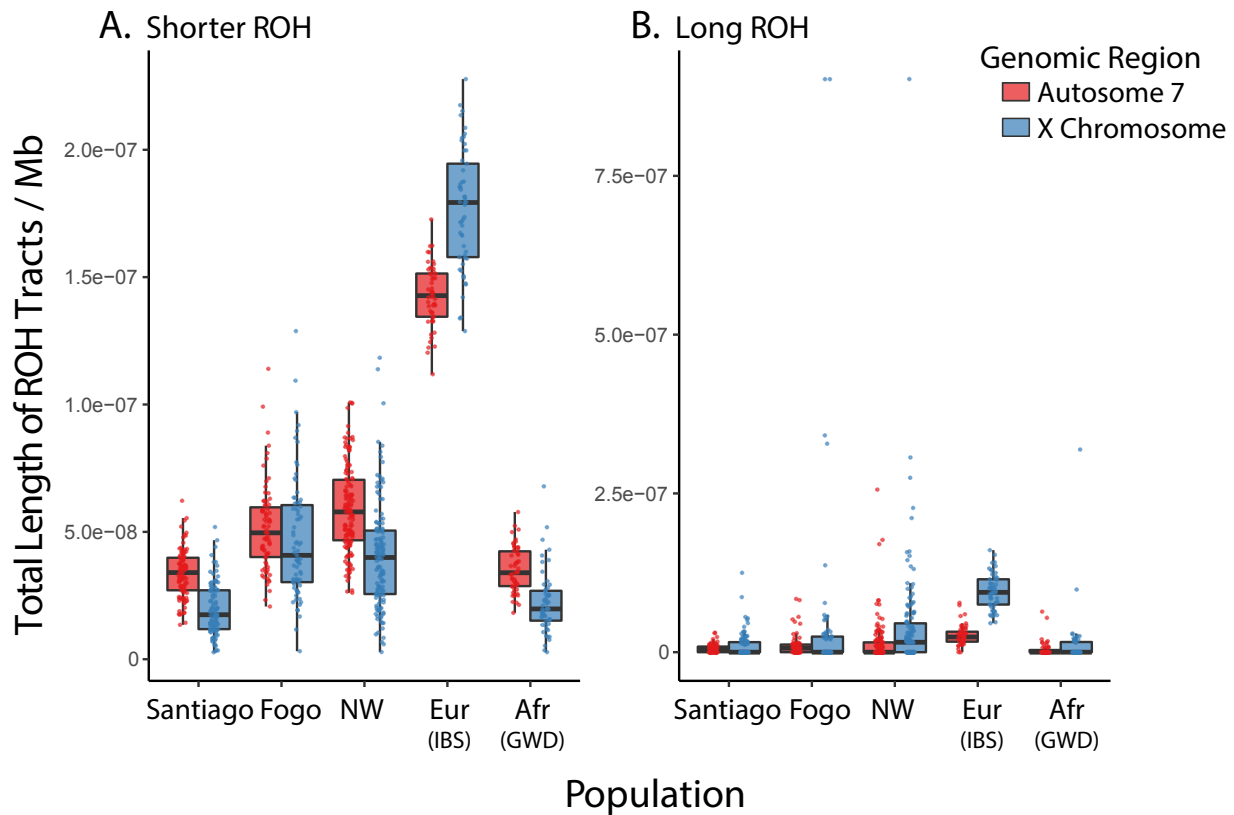

**Fig 6 | Autosomal (chromosome 7) vs X chromosome distributions of ROH by class.** (A) shows the population-specific distributions of the total length of shorter ROH per individual on the X chromosome compared to an autosome. Chromosome 7 was chosen as the autosomal point of comparison, given that it is the autosome most similar in size to the X chromosome. Totals are shown for females only, so that the same samples are being compared across the X chromosome and chromosome 7. Totals are plotted per Mb to account for slight differences in chromosome lengths. (B) shows the same information for long ROH.
